# Supplementary material for: Effects of In-Channel Structure on Chinook Salmon Spawning Habitat and Embryo Production
Source: MDPI journal article supplement (doi:10.3390/w14010083), 2022-01-03
Supplement: s1 [file s1]

Archive with 1 entries (1 files):
- water-1502181-supplementary.pdf
