# Supplementary material for: Effects of In-Channel Structure on Chinook Salmon Spawning Habitat and Embryo Production
Source: MDPI journal article supplement (doi:10.3390/w14010083), 2022-01-03
Supplement: s1 [file s1 › water-1502181-supplementary.pdf]

## Article

# Effects of In-Channel Structure on Chinook Salmon Spawning Habitat and Embryo Production

Robyn L. Bilski <sup>1,\*</sup>, Joseph M. Wheaton <sup>2</sup> and Joseph E. Merz <sup>3,4</sup>

<sup>1</sup> California Department of Fish and Wildlife, West Sacramento, CA 95605, USA

<sup>2</sup> Department of Watershed Sciences, Utah State University, Logan, UT 84322, USA; joe.wheaton@usu.edu

<sup>3</sup> Cramer Fish Sciences, River Science and Restoration Lab, West Sacramento, CA 95691, USA;

jmerz@fishsciences.net

<sup>4</sup> Department of Ecology & Evolutionary Biology, University of California, Santa Cruz, CA 95060, USA

\* Correspondence: robyn.bilski@wildlife.ca.gov

## Supplementary Materials

**Table S1.** Correlation matrix among independent variables measured for Chinook salmon embryo survival, hatching rate, and growth at sites containing and lacking in-channel structure on the lower Mokelumne River. Variable abbreviations are as follows: COND = conductivity, DO = dissolved oxygen, SWD = surface water depth; SWV-A = surface water velocity (all); SWV-H = surface water velocity (horizontal); SWV-V = surface water velocity (vertical); VHGD = vertical hydraulic gradient (directional measurements); VHGM = vertical hydraulic gradient (magnitude); ATEMP = average daily temperature.

| Variable | DO            | COND   | pH     | VHG-D  | VHG-M  | ATEMP  | SWV-H         | SWV-V         | SWV-A |
|----------|---------------|--------|--------|--------|--------|--------|---------------|---------------|-------|
| COND     | <b>−0.614</b> |        |        |        |        |        |               |               |       |
| pH       | 0.378         | −0.046 |        |        |        |        |               |               |       |
| VHG-D    | −0.199        | 0.147  | 0.142  |        |        |        |               |               |       |
| VHG-M    | −0.168        | 0.001  | −0.127 | −0.034 |        |        |               |               |       |
| ATEMP    | 0.092         | 0.120  | 0.239  | −0.136 | −0.261 |        |               |               |       |
| SWV-H    | 0.295         | −0.108 | 0.175  | 0.079  | −0.002 | −0.113 |               |               |       |
| SWV-V    | −0.249        | 0.108  | −0.345 | 0.107  | 0.128  | −0.123 | <b>−0.651</b> |               |       |
| SWV-A    | 0.305         | −0.131 | 0.181  | 0.109  | −0.021 | −0.098 | <b>0.987</b>  | <b>−0.662</b> |       |
| SWD      | 0.068         | 0.012  | 0.097  | −0.227 | −0.057 | −0.124 | −0.020        | −0.049        | 0.015 |
